# Supplementary material for: Erythrocyte-like hollow carbon capsules and their application in proton exchange membrane fuel cells
Source: Royal Society of Chemistry journal article supplement (doi:10.1039/c0cp00698j), 2010-01-01
Supplement: c0cp00698j.pdf [file c0cp00698j.pdf]

## Supporting Information

# Erythrocyte-like hollow carbon capsules and their application in proton exchange membrane fuel cell

*Jung Ho Kim and Jong-Sung Yu\**

Department of Advanced Materials Chemistry, BK21 Research Team, Korea University  
208 Seochang, Jochiwon, ChungNam 339-700, Republic of Korea  
Fax: (+82)-41-867-5396, E-mail: [jsyu212@korea.ac.kr](mailto:jsyu212@korea.ac.kr)

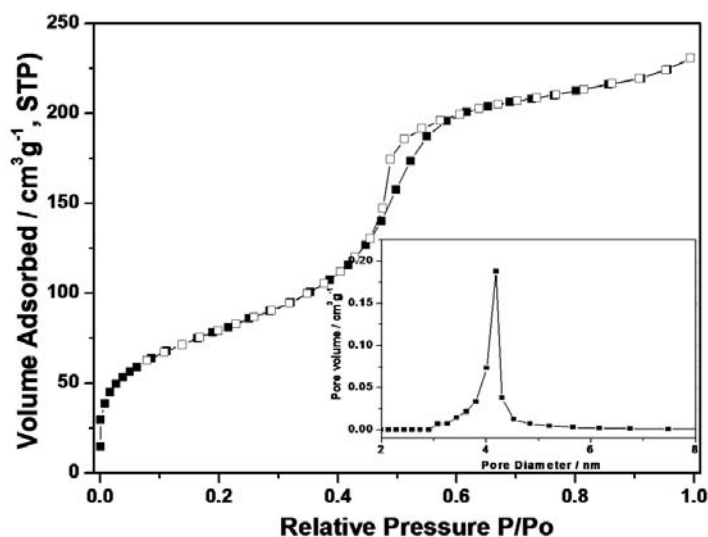

**Fig. S1** N<sub>2</sub> adsorption-desorption isotherms and pore size distribution of SCMS silica template.
